# Supplementary material for: Effects of Virtual Reality Intervention on Cognition and Motor Function in Older Adults With Mild Cognitive Impairment or Dementia: A Systematic Review and Meta-Analysis
Source: Frontiers journal article supplement (doi:10.3389/fnagi.2021.586999), 2021-05-05
Supplement: Data_Sheet_1.XLS [file Data_Sheet_1.XLS]

## Sheet: PubMed search manager
Search number	Query	Filters	Search Details	Results
#8	((((((((((((((((((("Dementia"[Mesh]) OR (Dementias[Title/Abstract])) OR (Amentia[Title/Abstract])) OR (Amentias[Title/Abstract])) OR (Senile Paranoid Dementia[Title/Abstract])) OR (Dementias, Senile Paranoid[Title/Abstract])) OR (Paranoid Dementia, Senile[Title/Abstract])) OR (Paranoid Dementias, Senile[Title/Abstract])) OR (Senile Paranoid Dementias[Title/Abstract])) OR (Familial Dementia[Title/…	Randomized Controlled Trial	((((("Dementia"[MeSH Terms] OR "Dementias"[Title/Abstract] OR "Amentia"[Title/Abstract] OR "Amentias"[Title/Abstract] OR (("Senile"[All Fields] OR "seniles"[All Fields] OR "senility"[All Fields]) AND "paranoid dementia"[Title/Abstract]) OR (("Dementia"[MeSH Terms] OR "Dementia"[All Fields] OR "Dementias"[All Fields] OR "dementia s"[All Fields]) AND "senile paranoid"[Title/Abstract]) OR (("Paranoi…	1547
#7	((((((((((((((((("Dementia"[Mesh]) OR (Dementias[Title/Abstract])) OR (Amentia[Title/Abstract])) OR (Amentias[Title/Abstract])) OR (Senile Paranoid Dementia[Title/Abstract])) OR (Dementias, Senile Paranoid[Title/Abstract])) OR (Paranoid Dementia, Senile[Title/Abstract])) OR (Paranoid Dementias, Senile[Title/Abstract])) OR (Senile Paranoid Dementias[Title/Abstract])) OR (Familial Dementia[Title/Ab…	Randomized Controlled Trial	((("Dementia"[MeSH Terms] OR "Dementias"[Title/Abstract] OR "Amentia"[Title/Abstract] OR "Amentias"[Title/Abstract] OR (("Senile"[All Fields] OR "seniles"[All Fields] OR "senility"[All Fields]) AND "paranoid dementia"[Title/Abstract]) OR (("Dementia"[MeSH Terms] OR "Dementia"[All Fields] OR "Dementias"[All Fields] OR "dementia s"[All Fields]) AND "senile paranoid"[Title/Abstract]) OR (("Paranoid"…	6652
#6	(((((((Cognition[MeSH Terms]) OR (Cognitions[Title/Abstract])) OR (Cognitive Function[Title/Abstract])) OR (Cognitive Functions[Title/Abstract])) OR (Function, Cognitive[Title/Abstract])) OR (Functions, Cognitive[Title/Abstract]))) AND (randomizedcontrolledtrial[Filter])) OR ((motor function[Title/Abstract]) AND (randomizedcontrolledtrial[Filter]))	Randomized Controlled Trial	(("cognition"[MeSH Terms] OR "Cognitions"[Title/Abstract] OR "cognitive function"[Title/Abstract] OR "cognitive functions"[Title/Abstract] OR "function cognitive"[Title/Abstract] OR "functions cognitive"[Title/Abstract]) AND "randomized controlled trial"[Publication Type]) OR ("motor function"[Title/Abstract] AND "randomized controlled trial"[Publication Type])	12478
#5	(motor function[Title/Abstract])	Randomized Controlled Trial	"motor function"[Title/Abstract]	1543
#4	((((((Cognition[MeSH Terms]) OR (Cognitions[Title/Abstract])) OR (Cognitive Function[Title/Abstract])) OR (Cognitive Functions[Title/Abstract])) OR (Function, Cognitive[Title/Abstract])) OR (Functions, Cognitive[Title/Abstract])))	Randomized Controlled Trial	"cognition"[MeSH Terms] OR "Cognitions"[Title/Abstract] OR "cognitive function"[Title/Abstract] OR "cognitive functions"[Title/Abstract] OR "function cognitive"[Title/Abstract] OR "functions cognitive"[Title/Abstract]	11036
#3	(((((((((((((Virtual Reality[MeSH Terms]) OR (Reality, Virtual[Title/Abstract])) OR (Virtual Reality, Educational[Title/Abstract])) OR (Educational Virtual Realities[Title/Abstract])) OR (Educational Virtual Reality[Title/Abstract])) OR (Reality, Educational Virtual[Title/Abstract])) OR (Virtual Realities, Educational[Title/Abstract])) OR (Virtual Reality, Instructional[Title/Abstract])) OR (Inst…	Randomized Controlled Trial	"virtual reality"[MeSH Terms] OR "reality virtual"[Title/Abstract] OR "virtual reality educational"[Title/Abstract] OR "educational virtual realities"[Title/Abstract] OR "educational virtual reality"[Title/Abstract] OR (("Realities"[All Fields] OR "Reality"[All Fields]) AND "educational virtual"[Title/Abstract]) OR ((("Virtual"[All Fields] OR "virtuality"[All Fields] OR "virtualization"[All Field…	346
#2	(((((((((((((((((((((((((((((cognitive dysfunction[MeSH Terms]) OR (mild cognitive impairment[Title/Abstract])) OR (Cognitive Dysfunctions[Title/Abstract])) OR (Dysfunction, Cognitive[Title/Abstract])) OR (Dysfunctions, Cognitive[Title/Abstract])) OR (Cognitive Impairments[Title/Abstract])) OR (Cognitive Impairment[Title/Abstract])) OR (Impairment, Cognitive[Title/Abstract])) OR (Impairments, Cog…	Randomized Controlled Trial	"cognitive dysfunction"[MeSH Terms] OR "mild cognitive impairment"[Title/Abstract] OR "cognitive dysfunctions"[Title/Abstract] OR "dysfunction cognitive"[Title/Abstract] OR "dysfunctions cognitive"[Title/Abstract] OR "cognitive impairments"[Title/Abstract] OR "cognitive impairment"[Title/Abstract] OR "impairment cognitive"[Title/Abstract] OR "impairments cognitive"[Title/Abstract] OR "mild cognit…	3874
#1	(((((((((((((((("Dementia"[Mesh]) OR (Dementias[Title/Abstract])) OR (Amentia[Title/Abstract])) OR (Amentias[Title/Abstract])) OR (Senile Paranoid Dementia[Title/Abstract])) OR (Dementias, Senile Paranoid[Title/Abstract])) OR (Paranoid Dementia, Senile[Title/Abstract])) OR (Paranoid Dementias, Senile[Title/Abstract])) OR (Senile Paranoid Dementias[Title/Abstract])) OR (Familial Dementia[Title/Abs…	Randomized Controlled Trial	"Dementia"[MeSH Terms] OR "Dementias"[Title/Abstract] OR "Amentia"[Title/Abstract] OR "Amentias"[Title/Abstract] OR (("Senile"[All Fields] OR "seniles"[All Fields] OR "senility"[All Fields]) AND "paranoid dementia"[Title/Abstract]) OR (("Dementia"[MeSH Terms] OR "Dementia"[All Fields] OR "Dementias"[All Fields] OR "dementia s"[All Fields]) AND "senile paranoid"[Title/Abstract]) OR (("Paranoid"[Al…	3577
